# Supplementary material for: Understanding Educational and Psychosocial Factors Associated with Alcohol Use among Adolescents in Denmark; Implications for Health Literacy Interventions
Source: Int J Environ Res Public Health. 2018 Aug 6;15(8):1671. doi: 10.3390/ijerph15081671 (PMC6121249; doi:10.3390/ijerph15081671)
Supplement: Supplementary file 1 [file ijerph-15-01671-s001.pdf]

## Supplementary materials

**Table S1.** Univariable analysis. Factors associated with alcohol consumption, odds ratios and 95% confidence intervals.

|                                                                | Drinking any alcohol<br>during the last 30 days | Been intoxicated during<br>the last 30 days | Problems because of<br>own alcohol use during<br>the last 12 months |
|----------------------------------------------------------------|-------------------------------------------------|---------------------------------------------|---------------------------------------------------------------------|
|                                                                | OR (95% CI)                                     | OR (95% CI)                                 | OR (95% CI)                                                         |
| Gender                                                         |                                                 |                                             |                                                                     |
| male                                                           | reference                                       | reference                                   | reference                                                           |
| female                                                         | .91 (.75 to 1.10)                               | .94 (.80 to 1.11)                           | .91 (.78 to 1.07)                                                   |
| School performance†                                            |                                                 |                                             |                                                                     |
| 6-8.9                                                          | reference                                       | reference                                   | reference                                                           |
| >9                                                             | .63 (.50 to .80)**                              | .74 (.60 to .92)**                          | .51 (.41 to .64)**                                                  |
| <6                                                             | .83 (.63 to 1.10)                               | 1.17 (.93 to 1.47)                          | 1.34 (1.07 to 1.67)*                                                |
| Father's education                                             |                                                 |                                             |                                                                     |
| Medium long or higher education                                | reference                                       | reference                                   | reference                                                           |
| Upper secondary education                                      | 1.03 (.77 to 1.37)                              | .997 (.79 to 1.26)                          | 1.10 (.87 to 1.38)                                                  |
| Lower secondary education or less                              | 1.13 (.84 to 1.50)                              | 1.11 (.88 to 1.40)                          | 1.37 (1.09 to 1.72)**                                               |
| Mother's education                                             |                                                 |                                             |                                                                     |
| Medium long or higher education                                | reference                                       | reference                                   | reference                                                           |
| Upper secondary education                                      | 1.20 (0.94 to 1.55)                             | .94 (.77 to 1.14)                           | 1.04 (.85 to 1.27)                                                  |
| Lower secondary education or less                              | 1.05 (0.76 to 1.44)                             | .90 (.69 to 1.17)                           | 1.40 (1.09 to 1.82)*                                                |
| Wealth                                                         |                                                 |                                             |                                                                     |
| About the same                                                 | reference                                       | reference                                   | reference                                                           |
| Better off                                                     | 1.10 (.89 to 1.36)                              | 1.28 (1.07 to 1.52)**                       | 1.20 (1.01 to 1.43)*                                                |
| Less well off                                                  | .87 (.63 to 1.22)                               | 1.09 (.82 to 1.45)                          | 1.63 (1.24 to 2.15)**                                               |
| Pos. alcohol expectancies (things happen<br>to you personally) |                                                 |                                             |                                                                     |
| Likely                                                         | reference                                       | reference                                   | reference                                                           |
| Unsure / Unlikely                                              | .13 (.10 to .19)**                              | .07 (.03 to .14)**                          | .08 (.04 to .14)**                                                  |
| Neg. alcohol expectancies<br>(things happen to you personally) |                                                 |                                             |                                                                     |
| Unsure / Unlikely                                              | reference                                       | reference                                   | reference                                                           |
| Likely                                                         | 1.92 (1.56 to 2.36)**                           | 3.08 (2.50 to 3.80)**                       | 3.57 (2.91 to 4.40)**                                               |
| Belief risk                                                    |                                                 |                                             |                                                                     |
| Risk                                                           | reference                                       | reference                                   | reference                                                           |
| No risk or don't know                                          | .45 (.29 to .69)**                              | .68 (.44 to 1.05)                           | .86 (.56 to 1.30)                                                   |
| Satisfied health                                               |                                                 |                                             |                                                                     |
| Satisfied                                                      | reference                                       | reference                                   | reference                                                           |
| Not satisfied or Neither nor                                   | 1.03 (.78 to 1.36)                              | 1.26 (1.01 to 1.57)*                        | 1.60 (1.28 to 1.99)**                                               |
| Satisfied themselves                                           |                                                 |                                             |                                                                     |
| Satisfied                                                      | reference                                       | reference                                   | reference                                                           |
| Not satisfied or Neither nor                                   | 0.96 (.77 to 1.21)                              | 1.18 (.98 to 1.42)                          | 1.19 (.99 to 1.43)                                                  |
| Parents know where Saturday                                    |                                                 |                                             |                                                                     |
| Know always / quiet often                                      | reference                                       | reference                                   | reference                                                           |
| Know sometimes / Usually don't know                            | 2.07 (1.22 to 3.52)**                           | 2.89 (2.02 to 4.14)**                       | 5.18 (3.44 to 7.80)**                                               |
| Satisfied relationship mother                                  |                                                 |                                             |                                                                     |
| Satisfied                                                      | reference                                       | reference                                   | reference                                                           |
| Not satisfied or Neither nor                                   | 1.07 (.79 to 1.47)                              | 1.59 (1.24 to 2.03)**                       | 2.37 (1.84 to 3.05)**                                               |
| Satisfied relationship father                                  |                                                 |                                             |                                                                     |
| Satisfied                                                      | reference                                       | reference                                   | reference                                                           |
| Not satisfied or Neither nor                                   | 1.03 (.79 to 1.34)                              | 1.61 (1.30 to 1.99)**                       | 2.11 (1.70 to 2.62)**                                               |
| Satisfied relationship friends                                 |                                                 |                                             |                                                                     |
| Satisfied                                                      | reference                                       | reference                                   | reference                                                           |
| Not satisfied or Neither nor                                   | .47 (.34 to .65)**                              | .73 (.53 to 1.01)                           | 0.92 (.68 to 1.24)                                                  |
| Serious problems with parents                                  |                                                 |                                             |                                                                     |
| Zero occasions                                                 | reference                                       | reference                                   | reference                                                           |
| 1 or more occasion                                             | 1.74 (1.37 to 2.20)**                           | 1.97 (1.65 to 2.35)**                       | 3.56 (2.96 to 4.27)**                                               |
| Serious problems with friends                                  |                                                 |                                             |                                                                     |
| Zero occasions                                                 | reference                                       | reference                                   | reference                                                           |
| 1 or more occasion                                             | 1.66 (1.33 to 2.07)**                           | 1.82 (1.54 to 2.15)**                       | 3.94 (3.31 to 4.69)**                                               |

|                          |                    |                    |                    |
|--------------------------|--------------------|--------------------|--------------------|
| Friends drink            |                    |                    |                    |
| Most / All               | reference          | reference          | reference          |
| None / A few / Some      | .21 (.16 to .28)** | .25 (.17 to .35)** | .30 (.21 to .41)** |
| Friends get drunk        |                    |                    |                    |
| Most / All               | reference          | reference          | reference          |
| None / A few / Some      | .35 (.29 to .43)** | .26 (.21 to .33)** | .37 (.31 to .45)** |
| Older siblings drink     |                    |                    |                    |
| Yes                      | reference          | reference          | reference          |
| No                       | .34 (.24 to .48)** | .41 (.28 to .60)** | .46 (.32 to .66)** |
| Older siblings get drunk |                    |                    |                    |
| Yes                      | reference          | reference          | reference          |
| No                       | .40 (.30 to .53)** | .41 (.31 to .55)** | .44 (.33 to .58)** |

significant results \* for  $p < 0.05$  & \*\* for  $p < 0.01$ ; †related to the Danish grading system

**Table S2.** Multivariable gender-separated analysis. Factors associated with alcohol consumption, odds ratios and 95% confidence intervals.

|                                                                | Drinking any alcohol<br>during the last 30 days | Been intoxicated<br>during the last 30<br>days | Problems because of<br>own alcohol use during<br>the last 12 month |
|----------------------------------------------------------------|-------------------------------------------------|------------------------------------------------|--------------------------------------------------------------------|
|                                                                | OR (95% CI)                                     | OR (95% CI)                                    | OR (95% CI)                                                        |
| School performance†                                            |                                                 |                                                |                                                                    |
| 6-8.9 (average)                                                | reference                                       | reference                                      | reference                                                          |
| >9 (above average) – girls                                     | .41 (.23 to .74)**                              | .71 (.43 to 1.18)                              | .50 (.29 to .84)*                                                  |
| <6 (below average) – girls                                     | .75 (.27 to 2.05)                               | 1.61 (.76 to 3.40)                             | .95 (.43 to 2.11)                                                  |
| >9 (above average) – boys                                      | 1.06 (.50 to 2.26)                              | 1.22 (.67 to 2.23)                             | .68 (.37 to 1.27)                                                  |
| <6 (below average) – boys                                      | 2.81 (.94 to 8.34)                              | 1.41 (.75 to 2.63)                             | 1.45 (.76 to 2.76)                                                 |
| Father's education                                             |                                                 |                                                |                                                                    |
| Medium long or higher education                                | reference                                       | reference                                      | reference                                                          |
| Upper secondary education – girls                              | .69 (.34 to 1.40)                               | 1.63 (.94 to 2.85)                             | 1.42 (.80 to 2.53)                                                 |
| Lower secondary education or less – girls                      | .84 (.40 to 1.73)                               | 1.26 (.70 to 2.27)                             | 2.01 (1.10 to 3.66)*                                               |
| Upper secondary education – boys                               | .70 (.32 to 1.54)                               | .73 (.40 to 1.33)                              | .92 (.51 to 1.69)                                                  |
| Lower secondary education or less – boys                       | .97 (.42 to 2.24)                               | .73 (.39 to 1.35)                              | .88 (.47 to 1.65)                                                  |
| Mother's education                                             |                                                 |                                                |                                                                    |
| Medium long or higher education                                | reference                                       | reference                                      | reference                                                          |
| Upper secondary education – girls                              | 1.34 (.69 to 2.62)                              | .53 (.32 to .90)*                              | .82 (.48 to 1.40)                                                  |
| Lower secondary education or less – girls                      | .63 (.27 to 1.43)                               | .46 (.23 to .90)*                              | .76 (.38 to 1.52)                                                  |
| Upper secondary education – boys                               | 1.38 (.68 to 2.79)                              | 1.47 (.86 to 2.50)                             | 2.02 (1.18 to 3.45)*                                               |
| Lower secondary education or less – boys                       | 1.44 (.53 to 3.90)                              | 1.47 (.73 to 2.96)                             | 2.86 (1.39 to 5.88)**                                              |
| Wealth                                                         |                                                 |                                                |                                                                    |
| About the same                                                 | reference                                       | reference                                      | reference                                                          |
| Better off – girls                                             | 1.29 (.73 to 2.26)                              | 1.33 (.85 to 2.08)                             | 1.29 (.81 to 2.04)                                                 |
| Less well off – girls                                          | .38 (.14 to 1.04)                               | .83 (.33 to 2.11)                              | 1.64 (.64 to 4.23)                                                 |
| Better off – boys                                              | 1.06 (.56 to 2.01)                              | 1.41 (.86 to 2.31)                             | 1.13 (.69 to 1.86)                                                 |
| Less well off – boys                                           | 1.45 (.40 to 5.26)                              | 1.00 (.39 to 2.58)                             | .64 (.25 to 1.66)                                                  |
| Pos. alcohol expectancies (things happen to<br>you personally) |                                                 |                                                |                                                                    |
| Likely                                                         | reference                                       | reference                                      | reference                                                          |
| Unsure / Unlikely – girls                                      | .12 (.35 to .40)**                              | .18 (.02 to 1.47)                              | .12 (.01 to 1.12)                                                  |
| Unsure / Unlikely – boys                                       | .44 (.17 to 1.12)                               | .27 (.06 to 1.25)                              | .17 (.37 to .80)*                                                  |
| Neg. alcohol expectancies<br>(things happen to you personally) |                                                 |                                                |                                                                    |
| Unsure / Unlikely                                              | reference                                       | reference                                      | reference                                                          |
| Likely – girls                                                 | .72 (.38 to 1.40)                               | 1.95 (1.11 to 3.43)*                           | 2.10 (1.18 to 3.75)*                                               |
| Likely – boys                                                  | 1.92 (1.03 to 3.57)*                            | 2.65 (1.54 to 4.56)**                          | 3.93 (2.28 to 6.80)**                                              |
| Belief risk                                                    |                                                 |                                                |                                                                    |
| Risk                                                           | reference                                       | reference                                      | reference                                                          |
| No risk or don't know – girls                                  | .98 (.04 to 23.46)                              | .38 (.03 to 4.65)                              | 1 (omitted,<br>collinearity)                                       |
| No risk or don't know – boys                                   | .12 (.04 to .25)**                              | .54 (.18 to 1.60)                              | .57 (.19 to 1.70)                                                  |
| Satisfied health                                               |                                                 |                                                |                                                                    |
| Satisfied                                                      | reference                                       | reference                                      | reference                                                          |
| Not satisfied or Neither nor – girls                           | .63 (.30 to 1.31)                               | .70 (.39 to 1.25)                              | .93 (.50 to 1.72)                                                  |
| Not satisfied or Neither nor – boys                            | .77 (.29 to 2.01)                               | 1.28 (.59 to 2.77)                             | .98 (.44 to 2.19)                                                  |
| Satisfied themselves                                           |                                                 |                                                |                                                                    |
| Satisfied                                                      | reference                                       | reference                                      | reference                                                          |

|                                             |                    |                       |                       |
|---------------------------------------------|--------------------|-----------------------|-----------------------|
| Not satisfied or Neither nor – girls        | 1.52 (.82 to 2.83) | 1.44 (.91 to 2.28)    | .98 (.60 to 1.59)     |
| Not satisfied or Neither nor – boys         | .57 (.24 to 1.38)  | 1.26 (.61 to 2.61)    | 1.32 (.63 to 2.76)    |
| Satisfied mother                            |                    |                       |                       |
| Satisfied                                   | reference          | reference             | reference             |
| Not satisfied or Neither nor – girls        | 1.13 (.38 to 3.35) | 1.25 (.60 to 2.63)    | 1.85 (.83 to 4.14)    |
| Not satisfied or Neither nor – boys         | 1.26 (.33 to 4.81) | .82 (.35 to 1.96)     | 1.74 (.69 to 4.41)    |
| Satisfied father                            |                    |                       |                       |
| Satisfied                                   | reference          | reference             | reference             |
| Not satisfied or Neither nor – girls        | 1.29 (.56 to 2.95) | 1.58 (.87 to 2.89)    | 1.13 (.60 to 2.13)    |
| Not satisfied or Neither nor – boys         | .46 (.18 to 1.19)  | .79 (.36 to 1.73)     | .92 (.42 to 2.03)     |
| Satisfied friends                           |                    |                       |                       |
| Satisfied                                   | reference          | reference             | reference             |
| Not satisfied or Neither nor – girls        | .39 (.16 to .95)*  | .50 (.22 to 1.13)     | .70 (.30 to 1.62)     |
| Not satisfied or Neither nor – boys         | .26 (.08 to .85)*  | .34 (.10 to 1.17)     | .76 (.24 to 2.39)     |
| Parents know where Saturday                 |                    |                       |                       |
| Know always / quiet often                   | reference          | reference             | reference             |
| Know sometimes / Usually don't know – girls | .99 (.11 to 8.89)  | .81 (.23 to 2.89)     | .80 (.18 to 3.60)     |
| Know sometimes / Usually don't know – boys  | .75 (.17 to 3.25)  | .78 (.28 to 2.21)     | 1.18 (.36 to 3.86)    |
| Serious problems with parents               |                    |                       |                       |
| Zero occasions                              | reference          | reference             | reference             |
| 1 or more occasion – girls                  | 1.83 (.87 to 3.82) | .94 (.55 to 1.59)     | 1.53 (.90 to 2.62)    |
| 1 or more occasion – boys                   | 1.73 (.72 to 4.13) | 2.09 (1.19 to 3.67)*  | 1.94 (1.09 to 3.47)*  |
| Serious problems with friends               |                    |                       |                       |
| Zero occasions                              | reference          | reference             | reference             |
| 1 or more occasion – girls                  | 1.78 (.96 to 3.30) | 2.19 (1.37 to 3.51)** | 3.36 (2.09 to 5.40)** |
| 1 or more occasion – boys                   | 1.37 (.60 to 3.12) | 1.02 (.60 to 1.73)    | 2.05 (1.18 to 3.57)*  |
| Friends drink                               |                    |                       |                       |
| Most / All                                  |                    | reference             | reference             |
| None A few / Some – girls                   | .30 (.11 to .83)*  | .66 (.17 to 2.52)     | .51 (.15 to 1.80)     |
| None / A few / Some – boys                  | .51 (.19 to 1.41)  | .47 (.12 to 1.83)     | .43 (.15 to 1.27)     |
| Friends get drunk                           |                    |                       |                       |
| Most / All                                  | reference          | reference             | reference             |
| None / A few / Some – girls                 | .70 (.36 to 1.36)  | .27 (.15 to .51)**    | .40 (.22 to .72)**    |
| None A few / Some – boys                    | 1.05 (.48 to 2.27) | .26 (.13 to .53)**    | .58 (.31 to 1.09)     |
| Older siblings drink                        |                    |                       |                       |
| Yes                                         | reference          | reference             | reference             |
| No – girls                                  | .23 (.05 to .95)*  | .90 (.22 to 3.77)     | 1.21 (.27 to 5.42)    |
| No – boys                                   | .83 (.28 to 2.44)  | .48 (.16 to 1.44)     | .63 (.22 to 1.81)     |
| Older siblings get drunk                    |                    |                       |                       |
| Yes                                         | reference          | reference             | reference             |
| No – girls                                  | 1.20 (.36 to 3.93) | .53 (.19 to 1.54)     | .29 (.10 to .89)*     |
| No – boys                                   | .52 (.22 to 1.24)  | .69 (.31 to 1.50)     | .81 (.38 to 1.74)     |

<sup>1</sup> significant results \* for p<0.05 & \*\* for p < 0.01; †related to the Danish grading system
